# Supplementary material for: Predictive Ability of Future Anxiety in Professional Decision-Making Skill among a Syrian Refugee Adolescent in Jordan
Source: Occup Ther Int. 2020 Mar 28;2020:4959785. doi: 10.1155/2020/4959785 (PMC7149486; doi:10.1155/2020/4959785)
Supplement: Supplementary Materials — The measures: it contains the tools which use in the research The Data file: it includes the data used in extracting research results. [file 4959785.f1.zip]

Archive with 2 entries (2 files):
- Data (1).xlsx
- measures (1).docx
