# Supplementary material for: Predictive Ability of Future Anxiety in Professional Decision-Making Skill among a Syrian Refugee Adolescent in Jordan
Source: Occup Ther Int. 2020 Mar 28;2020:4959785. doi: 10.1155/2020/4959785 (PMC7149486; doi:10.1155/2020/4959785)
Supplement: Supplementary Materials — The measures: it contains the tools which use in the research The Data file: it includes the data used in extracting research results. [file 4959785.f1.zip › Data (1).xlsx]

## Sheet: Sheet1
الجنس	التحصيل	a1	a2	a3	a2	a5	a6	a7	a8	a9	a10	a11	a12	a13	a14	a15	a16	a17	a18	a19	a20	a21	a22	a23	a24	a25	a26	a27	b1	b2	b3	b4	b5	b6	b7	b8	b9	b10	b11	b42	b13	b14	b15	b36	b17	b38	b19	b20	b21
2	3	2	1	1	1	2	4	5	3	4	2	3	3	3	3	2	3	4	4	2	3	3	5	5	4	4	5	2	5	3	3	3	2	4	3	2	2	3	2	3	2	2	3	4	2	2	4	3	2
2	2	4	2	4	2	3	5	4	4	3	5	5	2	1	3	1	1	4	5	5	5	5	5	3	5	1	5	1	2	3	1	3	3	3	2	1	3	1	1	4	1	2	3	4	1	3	1	5	2
2	2	3	2	3	1	3	3	2	2	2	2	4	5	3	4	5	5	3	4	5	5	3	4	4	4	5	5	2	1	1	1	3	1	3	2	1	3	1	1	5	5	1	5	5	2	5	5	3	5
2	1	1	3	2	1	3	4	4	5	5	1	5	5	3	5	5	5	5	5	5	5	5	1	5	2	5	5	2	2	2	1	3	2	3	2	1	3	2	1	4	1	1	2	3	1	2	1	2	2
2	2	2	3	2	1	2	3	3	4	4	2	4	3	2	5	5	5	4	5	5	5	3	3	2	4	5	5	3	5	3	2	2	3	4	3	2	3	2	4	4	2	3	5	4	4	2	1	5	5
2	3	1	3	1	1	2	5	4	1	3	2	5	5	2	5	5	5	3	4	2	5	5	4	2	4	1	4	2	5	3	1	3	2	3	2	1	3	1	1	2	1	1	5	3	2	4	1	2	5
2	2	3	2	2	1	4	4	5	4	3	4	1	1	3	2	2	2	2	3	3	3	2	3	3	1	4	3	3	1	2	2	3	2	4	3	1	3	2	2	2	2	2	2	3	3	3	2	2	2
2	3	1	1	3	3	4	3	4	5	4	4	4	5	5	5	5	5	5	5	2	4	3	3	4	4	5	4	2	5	5	2	3	4	4	3	5	3	5	2	4	1	3	5	4	3	4	2	4	5
2	2	2	1	2	3	5	2	4	5	4	4	3	3	2	4	3	4	3	3	2	3	3	3	3	4	4	5	3	3	2	1	4	2	4	3	5	3	3	2	4	1	1	2	5	2	4	2	5	2
2	2	5	1	1	5	5	2	4	1	2	4	5	3	2	4	5	1	3	3	1	3	3	4	5	2	3	5	2	5	5	3	2	5	5	2	4	3	5	1	5	3	5	2	5	3	3	2	3	5
2	2	2	2	2	1	3	3	3	4	4	2	3	4	3	2	3	3	4	2	3	4	5	5	5	5	4	3	2	4	3	4	2	3	4	5	4	3	2	1	3	3	3	4	4	4	3	4	3	3
2	3	1	1	1	1	5	1	1	1	3	1	1	1	3	1	1	1	1	3	3	3	2	3	3	5	5	5	2	5	4	2	3	3	3	3	1	3	5	3	5	3	5	5	5	3	3	3	2	5
2	2	1	5	5	5	5	4	5	4	3	5	5	4	5	5	4	5	4	4	2	4	5	4	4	4	5	4	2	1	1	1	3	1	3	2	5	3	1	1	4	1	5	3	5	1	5	1	3	1
2	1	5	1	3	3	5	5	5	5	3	2	3	2	2	4	3	4	3	3	3	3	3	4	4	5	5	5	2	5	5	3	3	3	3	2	1	3	5	1	4	1	3	3	3	5	5	1	3	1
2	2	2	1	3	3	5	1	1	5	4	5	2	3	5	5	5	4	5	5	5	3	5	2	5	2	5	5	1	3	3	1	3	2	4	5	2	3	1	3	4	5	4	3	4	2	3	1	2	3
2	3	1	3	1	2	4	4	4	5	3	4	4	5	5	5	5	4	4	5	5	3	3	3	3	1	5	5	3	4	2	1	3	1	4	2	4	5	1	5	2	2	2	3	3	1	3	1	3	3
2	2	1	3	2	1	3	4	4	5	5	1	5	5	3	5	5	5	5	5	5	5	5	1	5	2	5	5	2	5	5	3	3	1	3	2	1	3	1	1	4	1	1	1	3	2	2	1	3	1
2	1	1	1	1	2	4	5	5	3	4	4	5	4	5	5	5	5	4	5	2	5	5	5	5	2	4	5	3	4	2	1	3	1	4	2	4	5	1	5	2	2	2	3	3	1	3	1	3	3
2	2	2	2	2	1	3	3	3	4	4	2	3	4	3	2	3	3	4	2	3	4	5	5	5	5	4	3	2	2	2	2	2	2	3	3	1	3	1	2	4	2	3	2	4	1	3	3	2	2
1	3	4	4	3	1	3	4	4	4	4	2	5	4	2	5	4	4	4	4	5	4	2	3	4	2	4	5	4	4	3	2	2	2	4	3	5	3	1	1	3	4	3	4	3	3	3	3	3	4
1	2	2	1	2	3	3	2	2	5	4	5	5	4	3	3	5	5	5	4	5	4	2	5	4	5	4	5	4	5	2	1	3	2	4	2	1	3	3	2	2	1	3	3	3	1	3	1	4	5
1	2	3	4	4	2	3	4	2	5	4	4	5	3	1	4	3	3	4	3	2	3	3	4	2	1	3	3	4	3	2	4	3	3	4	3	4	2	2	1	5	1	4	4	3	4	4	1	4	3
1	2	4	4	4	2	1	1	1	1	1	2	1	1	2	1	1	1	2	2	1	2	3	2	1	2	1	2	1	5	5	3	3	5	4	3	4	2	3	1	4	2	3	3	4	2	3	4	5	4
1	2	2	1	1	3	2	5	3	4	5	2	4	5	1	4	3	4	3	2	1	3	2	1	1	2	4	3	2	5	5	4	3	3	4	3	1	3	5	3	2	1	3	4	3	1	5	1	5	2
1	3	4	4	4	2	1	1	1	1	1	2	1	1	1	3	2	1	2	1	2	1	1	2	1	2	1	2	2	4	3	4	3	5	3	4	5	4	5	4	4	4	4	4	5	4	4	5	4	4
1	1	4	2	1	1	5	4	4	3	3	2	4	3	2	3	4	3	3	4	3	5	3	4	2	2	5	3	2	4	3	4	3	5	3	4	4	3	5	3	4	3	3	4	4	5	3	4	3	4
1	3	2	2	2	3	1	1	1	2	3	4	1	2	2	1	1	1	3	1	1	1	3	2	2	1	2	1	4	5	5	5	5	5	5	5	3	3	4	3	5	5	5	5	5	5	5	5	5	5
1	1	3	4	4	3	2	4	3	2	4	2	4	2	2	2	3	2	3	3	3	4	3	2	2	2	3	2	2	5	4	3	2	1	4	3	4	3	2	3	3	5	2	4	4	4	5	2	3	5
1	1	5	1	4	3	3	1	2	5	5	2	5	5	2	3	5	3	4	4	3	4	1	3	4	4	4	1	4	5	5	5	5	5	4	4	4	3	4	3	4	2	4	5	3	5	4	3	5	4
1	3	4	4	4	2	1	1	1	1	1	2	1	1	2	1	1	1	2	1	1	1	1	2	1	1	1	1	1	3	5	4	5	4	3	4	2	4	2	5	3	2	4	2	4	4	5	3	4	5
1	2	2	2	5	2	3	1	1	2	2	2	3	3	2	2	3	3	2	2	3	3	2	2	3	2	3	3	3	5	4	3	3	3	4	4	2	4	2	4	2	4	1	5	3	5	5	1	5	3
1	2	3	3	2	5	4	2	3	5	3	5	1	4	3	5	1	3	4	2	2	1	2	1	2	2	1	3	1	4	2	5	3	3	4	2	3	5	5	4	4	3	5	3	4	4	3	2	3	4
1	2	4	4	4	2	3	3	3	3	2	2	3	2	3	5	5	4	3	3	3	4	2	3	3	2	2	5	4	4	3	4	5	4	5	5	4	3	2	3	3	5	3	4	4	5	4	5	3	2
1	2	4	5	5	2	4	4	4	4	4	2	3	3	3	3	2	2	4	5	5	4	3	3	4	4	3	2	3	2	4	3	5	3	5	3	2	3	3	3	3	4	4	3	4	4	4	4	3	3
1	2	4	4	5	3	3	3	4	4	3	2	4	4	3	3	3	4	3	3	3	2	3	3	2	5	2	4	3	2	4	3	2	3	4	3	3	5	3	4	2	3	4	1	5	4	3	3	3	4
1	1	4	5	4	2	3	3	2	2	2	2	3	3	2	3	1	1	2	3	3	3	2	2	2	2	2	2	2	3	4	4	3	4	4	3	3	2	4	2	4	1	2	3	4	3	3	3	4	4
1	3	3	3	4	2	4	4	4	4	4	2	3	3	3	4	3	3	3	3	3	4	3	3	4	5	4	4	2	2	3	3	2	1	3	3	3	3	2	4	4	4	4	3	3	3	2	3	4	4
1	2	3	4	4	3	4	3	2	2	3	2	1	4	2	2	2	1	2	1	3	1	3	3	2	2	2	3	3	5	4	3	2	2	3	3	2	5	3	5	5	2	4	3	5	2	3	3	5	3
1	2	1	4	4	2	2	4	3	3	4	2	4	4	3	3	3	2	3	3	2	3	2	3	2	2	2	3	4	2	4	2	2	2	4	3	3	3	2	3	2	5	4	4	4	2	4	2	5	2
1	1	2	2	2	2	3	3	3	3	3	2	3	3	3	3	3	3	4	3	2	3	5	4	3	4	3	3	3	4	2	2	2	2	3	3	4	4	5	4	4	3	3	4	5	4	4	4	5	4
1	3	2	2	2	3	1	1	1	2	1	1	2	1	1	1	3	1	1	2	3	2	1	1	2	1	1	2	2	4	4	3	4	4	3	3	2	3	2	4	2	3	4	2	5	4	5	4	5	4
1	1	2	1	3	3	3	3	4	5	5	2	5	5	3	3	3	3	3	3	3	3	3	1	4	2	1	4	4	5	5	5	5	5	5	5	5	5	5	5	5	5	5	5	3	1	5	5	5	5
1	2	4	3	4	2	3	3	2	2	2	2	3	3	2	3	1	1	2	3	3	3	2	2	2	2	2	2	2	3	4	4	3	4	4	3	3	2	4	2	4	1	2	3	4	3	3	3	4	4
1	1	3	3	4	2	3	5	4	5	3	4	4	3	2	4	1	4	4	4	2	3	2	2	2	2	2	4	2	2	2	2	3	3	4	3	2	3	2	2	3	2	4	4	4	3	4	5	3	3
1	2	3	4	3	2	2	3	3	3	2	2	4	4	2	4	4	4	4	4	3	4	2	3	3	4	2	2	2	4	2	2	2	2	3	3	4	4	4	5	4	5	4	4	4	3	3	3	4	5
1	3	4	4	4	2	1	1	1	1	1	2	1	1	2	1	1	1	2	1	1	1	1	2	1	1	1	1	1	4	3	4	3	5	3	4	5	4	5	4	4	4	4	4	5	4	4	5	4	4
1	2	4	2	1	1	5	4	4	3	3	2	4	3	2	3	4	3	3	4	3	5	3	4	2	2	5	3	2	4	3	4	3	5	3	4	4	3	5	3	4	3	3	4	4	5	3	4	3	4
1	3	2	2	2	1	1	1	3	1	1	1	2	1	2	2	1	1	1	1	1	3	2	1	1	1	1	2	2	5	5	5	5	5	5	5	3	3	4	3	5	5	5	5	5	5	5	5	5	5
1	2	3	4	4	3	2	4	3	2	4	2	4	2	2	2	3	2	3	3	3	4	3	2	2	2	3	2	2	5	4	3	2	1	4	3	4	3	2	3	3	5	2	4	4	4	5	2	3	5
1	1	4	5	4	2	3	3	2	2	2	2	3	3	2	3	1	1	2	3	3	3	2	2	2	2	2	2	2	3	4	4	3	4	4	3	3	2	4	2	4	1	2	3	4	3	3	3	4	4
1	2	4	5	4	2	3	3	2	2	2	2	3	3	2	3	1	1	2	3	3	3	2	2	2	2	2	2	2	3	4	4	3	4	4	3	3	2	4	2	4	1	2	3	4	3	3	3	4	4
1	1	2	1	1	3	2	5	3	4	5	2	4	5	1	4	3	4	3	2	1	3	2	1	1	2	4	3	2	5	5	4	3	3	4	3	1	3	5	3	2	1	3	4	3	1	5	1	5	2
1	2	4	4	4	2	1	1	1	1	1	2	1	1	2	1	1	1	2	1	1	1	1	2	1	1	1	1	1	4	3	4	3	5	3	4	5	4	5	4	4	4	4	4	5	4	4	5	4	4
1	1	4	2	1	1	5	4	4	3	3	2	4	3	2	3	4	3	3	4	3	5	3	4	2	2	5	3	2	4	3	4	3	5	3	4	4	3	5	3	4	3	3	4	4	5	3	4	3	4
1	2	4	4	4	2	1	1	1	1	1	2	1	1	2	1	1	1	2	1	1	1	1	2	1	1	1	1	1	5	5	5	5	5	5	5	3	3	4	3	5	5	5	5	5	5	5	5	5	5
1	2	3	4	4	3	2	4	3	2	4	2	4	2	2	2	3	2	3	3	3	4	3	2	2	2	3	2	2	5	4	3	2	1	4	3	4	3	2	3	3	5	2	4	4	4	5	2	3	5
1	2	4	4	4	2	1	1	1	1	1	2	1	1	2	1	1	1	2	1	1	1	1	2	1	1	1	1	1	5	5	5	5	5	4	4	4	3	4	3	4	2	4	5	3	5	4	3	5	4
1	2	4	4	4	2	1	1	1	1	1	2	1	1	2	1	1	1	2	1	1	1	1	2	1	1	1	1	1	3	5	4	5	4	3	4	2	4	2	5	3	2	4	2	4	4	5	3	4	5
1	3	2	2	5	2	3	1	1	2	2	2	3	3	2	2	3	3	2	2	3	3	2	2	3	2	3	3	3	5	4	3	3	3	4	4	2	4	2	4	2	4	1	5	3	5	5	1	5	3
1	1	3	3	2	5	4	2	3	5	3	5	1	4	3	5	1	3	4	2	2	1	2	1	2	2	1	3	1	4	2	5	3	3	4	2	3	5	5	4	4	3	5	3	4	4	3	2	3	4
1	3	2	2	2	3	1	1	1	2	1	1	2	1	1	1	3	1	1	2	3	2	1	1	2	1	1	2	2	4	3	4	5	4	5	5	4	3	2	3	3	5	3	4	4	5	4	5	3	2
1	3	4	2	4	2	1	1	1	1	1	2	1	1	1	3	2	1	2	1	2	1	1	2	1	2	1	2	2	5	4	3	5	3	5	3	2	3	3	3	3	4	4	3	4	4	4	4	3	3
1	3	4	3	3	2	1	1	1	1	1	2	1	1	2	1	1	1	2	1	3	3	1	2	3	2	3	1	1	5	4	3	2	3	4	3	3	5	3	4	2	3	4	1	5	4	3	3	3	4
1	2	5	1	4	3	3	1	2	5	5	2	5	5	2	3	5	3	4	4	3	4	1	3	4	4	4	1	4	3	3	4	3	4	5	5	4	3	2	3	3	5	3	4	4	5	4	5	3	2
1	2	4	4	3	1	3	4	4	4	4	2	5	4	2	5	4	4	4	4	5	4	2	3	4	2	4	5	4	5	4	3	2	1	4	3	4	3	2	3	3	5	2	4	4	4	5	2	3	5
1	2	3	3	4	2	4	4	4	4	4	2	3	3	3	4	3	3	3	3	2	4	3	3	2	5	2	3	4	4	4	5	4	3	4	3	2	3	3	3	3	4	4	3	4	4	4	4	3	3
1	2	3	3	4	2	4	4	4	4	4	2	3	3	3	4	3	3	3	3	3	4	3	3	4	5	4	4	2	4	3	4	5	4	5	5	4	3	2	3	3	5	3	4	4	5	4	5	3	2
1	2	5	1	4	3	3	1	2	5	5	2	5	5	2	3	5	3	4	4	3	4	1	3	4	4	4	1	4	5	5	5	5	5	5	5	3	3	4	3	5	5	5	5	5	5	5	5	5	5
2	2	2	1	1	1	2	4	5	3	4	2	3	3	3	3	2	3	4	4	2	3	3	5	5	4	4	5	2	5	3	3	3	2	4	3	2	2	3	2	3	2	2	3	4	2	2	4	3	2
2	1	4	2	4	2	3	5	4	4	3	5	5	2	1	3	1	1	4	5	5	5	5	5	3	5	1	5	1	2	3	1	3	3	3	2	1	3	1	1	4	1	2	3	4	1	3	1	5	2
2	3	3	2	3	1	3	3	2	2	2	2	4	5	3	4	5	5	3	4	5	5	3	4	4	4	5	5	2	1	1	1	3	1	3	2	1	3	1	1	5	5	1	5	5	2	5	5	3	5
2	3	1	3	2	1	3	4	4	5	5	1	5	5	3	5	5	5	5	5	5	5	5	1	5	2	5	5	2	2	2	1	3	2	3	2	1	3	2	1	4	1	1	2	3	1	2	1	2	2
2	2	2	3	2	1	2	3	3	4	4	2	4	3	2	5	5	5	4	5	5	5	3	3	2	4	5	5	3	5	3	2	2	3	4	3	2	3	2	4	4	2	3	5	4	4	2	1	5	5
1	2	4	4	3	1	3	4	4	4	4	2	5	4	2	5	4	4	4	4	5	4	2	3	4	2	4	5	4	4	3	2	2	2	4	3	5	3	1	1	3	4	3	4	3	3	3	3	3	4
1	3	2	1	2	3	3	2	2	5	4	5	5	4	3	3	5	5	5	4	5	4	2	5	4	5	4	5	4	5	2	1	3	2	4	2	1	3	3	2	2	1	3	3	3	1	3	1	4	5
1	2	3	4	4	2	3	4	2	5	4	4	5	3	1	4	3	3	4	3	2	3	3	4	2	1	3	3	4	3	2	4	3	3	4	3	4	2	2	1	5	1	4	4	3	4	4	1	4	3
1	3	4	4	4	2	1	1	1	1	1	2	1	1	2	1	1	1	2	2	1	2	3	2	1	2	1	2	1	5	5	3	3	5	4	3	4	2	3	1	4	2	3	3	4	2	3	4	5	4
1	3	2	1	1	3	2	5	3	4	5	2	4	5	1	4	3	4	3	2	1	3	2	1	1	2	4	3	2	5	5	4	3	3	4	3	1	3	5	3	2	1	3	4	3	1	5	1	5	2
1	3	4	4	4	2	1	1	1	1	1	2	1	1	1	3	2	1	2	1	2	1	1	2	1	2	1	2	2	4	3	4	3	5	3	4	5	4	5	4	4	4	4	4	5	4	4	5	4	4
1	2	4	2	1	1	5	4	4	3	3	2	4	3	2	3	4	3	3	4	3	5	3	4	2	2	5	3	2	4	3	4	3	5	3	4	4	3	5	3	4	3	3	4	4	5	3	4	3	4
1	2	2	2	2	3	1	1	1	2	3	4	1	2	2	1	1	1	3	1	1	1	3	2	2	1	2	1	4	5	5	5	5	5	5	5	3	3	4	3	5	5	5	5	5	5	5	5	5	5
1	3	3	4	4	3	2	4	3	2	4	2	4	2	2	2	3	2	3	3	3	4	3	2	2	2	3	2	2	5	4	3	2	1	4	3	4	3	2	3	3	5	2	4	4	4	5	2	3	5
1	1	5	1	4	3	3	1	2	5	5	2	5	5	2	3	5	3	4	4	3	4	1	3	4	4	4	1	4	5	5	5	5	5	4	4	4	3	4	3	4	2	4	5	3	5	4	3	5	4
1	2	4	4	5	3	3	3	4	4	3	2	4	4	3	3	3	4	3	3	3	2	3	3	2	5	2	4	3	2	4	3	2	3	4	3	3	5	3	4	2	3	4	1	5	4	3	3	3	4
1	3	4	5	4	2	3	3	2	2	2	2	3	3	2	3	1	1	2	3	3	3	2	2	2	2	2	2	2	3	4	4	3	4	4	3	3	2	4	2	4	1	2	3	4	3	3	3	4	4
1	3	3	3	4	2	4	4	4	4	4	2	3	3	3	4	3	3	3	3	3	4	3	3	4	5	4	4	2	2	3	3	2	1	3	3	3	3	2	4	4	4	4	3	3	3	2	3	4	4
1	3	3	4	4	3	4	3	2	2	3	2	1	4	2	2	2	1	2	1	3	1	3	3	2	2	2	3	3	5	4	3	2	2	3	3	2	5	3	5	5	2	4	3	5	2	3	3	5	3
2	2	1	3	1	1	2	5	4	1	3	2	5	5	2	5	5	5	3	4	2	5	5	4	2	4	1	4	2	5	3	1	3	2	3	2	1	3	1	1	2	1	1	5	3	2	4	1	2	5
2	1	3	2	2	1	4	4	5	4	3	4	1	1	3	2	2	2	2	3	3	3	2	3	3	1	4	3	3	1	2	2	3	2	4	3	1	3	2	2	2	2	2	2	3	3	3	2	2	2
2	2	1	1	3	3	4	3	4	5	4	4	4	5	5	5	5	5	5	5	2	4	3	3	4	4	5	4	2	5	5	2	3	4	4	3	5	3	5	2	4	1	3	5	4	3	4	2	4	5
2	1	2	1	2	3	5	2	4	5	4	4	3	3	2	4	3	4	3	3	2	3	3	3	3	4	4	5	3	3	2	1	4	2	4	3	5	3	3	2	4	1	1	2	5	2	4	2	5	2
2	2	5	1	1	5	5	2	4	1	2	4	5	3	2	4	5	1	3	3	1	3	3	4	5	2	3	5	2	5	5	3	2	5	5	2	4	3	5	1	5	3	5	2	5	3	3	2	3	5
2	1	2	2	2	1	3	3	3	4	4	2	3	4	3	2	3	3	4	2	3	4	5	5	5	5	4	3	2	4	3	4	2	3	4	5	4	3	2	1	3	3	3	4	4	4	3	4	3	3
2	2	1	1	1	1	5	1	1	1	3	1	1	1	3	1	1	1	1	3	3	3	2	3	3	5	5	5	2	5	4	2	3	3	3	3	1	3	5	3	5	3	5	5	5	3	3	3	2	5
1	3	4	4	4	2	1	1	1	1	1	2	1	1	2	1	1	1	2	1	1	1	1	2	1	1	1	1	1	3	5	4	5	4	3	4	2	4	2	5	3	2	4	2	4	4	5	3	4	5
1	3	2	2	5	2	3	1	1	2	2	2	3	3	2	2	3	3	2	2	3	3	2	2	3	2	3	3	3	5	4	3	3	3	4	4	2	4	2	4	2	4	1	5	3	5	5	1	5	3
1	1	3	3	2	5	4	2	3	5	3	5	1	4	3	5	1	3	4	2	2	1	2	1	2	2	1	3	1	4	2	5	3	3	4	2	3	5	5	4	4	3	5	3	4	4	3	2	3	4
1	1	4	4	4	2	3	3	3	3	2	2	3	2	3	5	5	4	3	3	3	4	2	3	3	2	2	5	4	4	3	4	5	4	5	5	4	3	2	3	3	5	3	4	4	5	4	5	3	2
1	1	4	5	5	2	4	4	4	4	4	2	3	3	3	3	2	2	4	5	5	4	3	3	4	4	3	2	3	2	4	3	5	3	5	3	2	3	3	3	3	4	4	3	4	4	4	4	3	3
1	2	3	4	3	2	2	3	3	3	2	2	4	4	2	4	4	4	4	4	3	4	2	3	3	4	2	2	2	4	2	2	2	2	3	3	4	4	4	5	4	5	4	4	4	3	3	3	4	5
1	2	4	4	4	2	1	1	1	1	1	2	1	1	2	1	1	1	2	1	1	1	1	2	1	1	1	1	1	2	3	3	2	1	3	3	3	3	2	4	4	4	4	3	3	3	2	3	4	4
1	3	4	2	1	1	5	4	4	3	3	2	4	3	2	3	4	3	3	4	3	5	3	4	2	2	5	3	2	4	3	4	3	5	3	4	4	3	5	3	4	3	3	4	4	5	3	4	3	4
1	2	2	2	2	1	1	1	3	1	1	1	2	1	2	2	1	1	1	1	1	3	2	1	1	1	1	2	2	5	5	5	5	5	5	5	3	3	4	3	5	5	5	5	5	5	5	5	5	5
1	2	4	4	5	3	3	3	4	4	3	2	4	4	3	3	3	4	3	3	3	2	3	3	2	5	2	4	3	2	4	3	2	3	4	3	3	5	3	4	2	3	4	1	5	4	3	3	3	4
1	3	4	5	4	2	3	3	2	2	2	2	3	3	2	3	1	1	2	3	3	3	2	2	2	2	2	2	2	3	4	4	3	4	4	3	3	2	4	2	4	1	2	3	4	3	3	3	4	4
1	2	3	3	4	2	4	4	4	4	4	2	3	3	3	4	3	3	3	3	3	4	3	3	4	5	4	4	2	2	3	3	2	1	3	3	3	3	2	4	4	4	4	3	3	3	2	3	4	4
1	1	3	4	4	3	4	3	2	2	3	2	1	4	2	2	2	1	2	1	3	1	3	3	2	2	2	3	3	5	4	3	2	2	3	3	2	5	3	5	5	2	4	3	5	2	3	3	5	3
1	1	3	4	4	2	2	4	3	3	4	2	4	4	3	3	3	2	3	3	2	3	2	3	2	2	2	3	4	2	4	2	2	2	4	3	3	3	2	3	2	5	4	4	4	2	4	2	5	2
1	1	2	2	2	2	3	3	3	3	3	2	3	3	3	3	3	3	4	3	2	3	5	4	3	4	3	3	3	4	2	2	2	2	3	3	4	4	5	4	4	3	3	4	5	4	4	4	5	4
1	2	2	2	2	3	1	1	1	2	1	1	2	1	1	1	3	1	1	2	3	2	1	1	2	1	1	2	2	4	4	3	4	4	3	3	2	3	2	4	2	3	4	2	5	4	5	4	5	4
1	2	2	1	3	3	3	3	4	5	5	2	5	5	3	3	3	3	3	3	3	3	3	1	4	2	1	4	4	5	5	5	5	5	5	5	5	5	5	5	5	5	5	5	3	1	5	5	5	5
1	3	4	3	4	2	3	3	2	2	2	2	3	3	2	3	1	1	2	3	3	3	2	2	2	2	2	2	2	3	4	4	3	4	4	3	3	2	4	2	4	1	2	3	4	3	3	3	4	4
1	2	3	3	4	2	3	5	4	5	3	4	4	3	2	4	1	4	4	4	2	3	2	2	2	2	2	4	2	2	2	2	3	3	4	3	2	3	2	2	3	2	4	4	4	3	4	5	3	3
2	3	1	5	5	5	5	4	5	4	3	5	5	4	5	5	4	5	4	4	2	4	5	4	4	4	5	4	2	1	1	1	3	1	3	2	5	3	1	1	4	1	5	3	5	1	5	1	3	1
2	2	5	1	3	3	5	5	5	5	3	2	3	2	2	4	3	4	3	3	3	3	3	4	4	5	5	5	2	5	5	3	3	3	3	2	1	3	5	1	4	1	3	3	3	5	5	1	3	1
2	2	2	1	3	3	5	1	1	5	4	5	2	3	5	5	5	4	5	5	5	3	5	2	5	2	5	5	1	3	3	1	3	2	4	5	2	3	1	3	4	5	4	3	4	2	3	1	2	3
2	2	1	3	1	2	4	4	4	5	3	4	4	5	5	5	5	4	4	5	5	3	3	3	3	1	5	5	3	4	2	1	3	1	4	2	4	5	1	5	2	2	2	3	3	1	3	1	3	3
2	3	1	3	2	1	3	4	4	5	5	1	5	5	3	5	5	5	5	5	5	5	5	1	5	2	5	5	2	2	2	2	3	3	4	3	2	3	2	2	3	2	4	4	4	3	4	5	3	3
2	3	1	1	1	2	4	5	5	3	4	4	5	4	5	5	5	5	4	5	2	5	5	5	5	2	4	5	3	3	4	4	3	4	4	3	3	2	4	2	4	1	2	3	4	3	3	3	4	4
2	3	5	3	2	3	4	4	5	3	2	2	3	2	5	5	4	5	4	4	5	4	5	4	4	2	5	5	3	2	2	2	2	2	3	3	1	3	1	2	4	2	3	2	4	1	3	3	2	2
1	2	4	2	1	1	5	4	4	3	3	2	4	3	2	3	4	3	3	4	3	5	3	4	2	2	5	3	2	4	3	4	3	5	3	4	4	3	5	3	4	3	3	4	4	5	3	4	3	4
1	3	4	4	4	2	1	1	1	1	1	2	1	1	2	1	1	1	2	1	1	1	1	2	1	1	1	1	1	5	5	5	5	5	5	5	3	3	4	3	5	5	5	5	5	5	5	5	5	5
1	3	3	4	4	3	2	4	3	2	4	2	4	2	2	2	3	2	3	3	3	4	3	2	2	2	3	2	2	5	4	3	2	1	4	3	4	3	2	3	3	5	2	4	4	4	5	2	3	5
1	2	4	4	4	2	1	1	1	1	1	2	1	1	2	1	1	1	2	1	1	1	1	2	1	1	1	1	1	5	5	5	5	5	4	4	4	3	4	3	4	2	4	5	3	5	4	3	5	4
1	3	4	4	4	2	1	1	1	1	1	2	1	1	2	1	1	1	2	1	1	1	1	2	1	1	1	1	1	3	5	4	5	4	3	4	2	4	2	5	3	2	4	2	4	4	5	3	4	5
1	2	3	4	4	3	2	4	3	2	4	2	4	2	2	2	3	2	3	3	3	4	3	2	2	2	3	2	2	5	4	3	2	1	4	3	4	3	2	3	3	5	2	4	4	4	5	2	3	5
1	3	4	5	4	2	3	3	2	2	2	2	3	3	2	3	1	1	2	3	3	3	2	2	2	2	2	2	2	3	4	4	3	4	4	3	3	2	4	2	4	1	2	3	4	3	3	3	4	4
1	2	4	5	4	2	3	3	2	2	2	2	3	3	2	3	1	1	2	3	3	3	2	2	2	2	2	2	2	3	4	4	3	4	4	3	3	2	4	2	4	1	2	3	4	3	3	3	4	4
1	1	2	1	1	3	2	5	3	4	5	2	4	5	1	4	3	4	3	2	1	3	2	1	1	2	4	3	2	5	5	4	3	3	4	3	1	3	5	3	2	1	3	4	3	1	5	1	5	2
1	2	4	4	4	2	1	1	1	1	1	2	1	1	2	1	1	1	2	1	1	1	1	2	1	1	1	1	1	4	3	4	3	5	3	4	5	4	5	4	4	4	4	4	5	4	4	5	4	4
1	3	4	4	3	1	3	4	4	4	4	2	5	4	2	5	4	4	4	4	5	4	2	3	4	2	4	5	4	5	4	3	2	1	4	3	4	3	2	3	3	5	2	4	4	4	5	2	3	5
1	1	3	3	4	2	4	4	4	4	4	2	3	3	3	4	3	3	3	3	2	4	3	3	2	5	2	3	4	4	4	5	4	3	4	3	2	3	3	3	3	4	4	3	4	4	4	4	3	3
1	1	3	3	4	2	4	4	4	4	4	2	3	3	3	4	3	3	3	3	3	4	3	3	4	5	4	4	2	4	3	4	5	4	5	5	4	3	2	3	3	5	3	4	4	5	4	5	3	2
1	3	5	1	4	3	3	1	2	5	5	2	5	5	2	3	5	3	4	4	3	4	1	3	4	4	4	1	4	5	5	5	5	5	5	5	3	3	4	3	5	5	5	5	5	5	5	5	5	5
1	2	2	2	5	2	3	1	1	2	2	2	3	3	2	2	3	3	2	2	3	3	2	2	3	2	3	3	3	5	4	3	3	3	4	4	2	4	2	4	2	4	1	5	3	5	5	1	5	3
1	3	3	3	2	5	4	2	3	5	3	5	1	4	3	5	1	3	4	2	2	1	2	1	2	2	1	3	1	4	2	5	3	3	4	2	3	5	5	4	4	3	5	3	4	4	3	2	3	4
1	2	2	2	2	3	1	1	1	2	1	1	2	1	1	1	3	1	1	2	3	2	1	1	2	1	1	2	2	4	3	4	5	4	5	5	4	3	2	3	3	5	3	4	4	5	4	5	3	2
1	3	4	2	4	2	1	1	1	1	1	2	1	1	1	3	2	1	2	1	2	1	1	2	1	2	1	2	2	5	4	3	5	3	5	3	2	3	3	3	3	4	4	3	4	4	4	4	3	3
1	3	4	3	3	2	1	1	1	1	1	2	1	1	2	1	1	1	2	1	3	3	1	2	3	2	3	1	1	5	4	3	2	3	4	3	3	5	3	4	2	3	4	1	5	4	3	3	3	4
1	3	5	1	4	3	3	1	2	5	5	2	5	5	2	3	5	3	4	4	3	4	1	3	4	4	4	1	4	3	3	4	3	4	5	5	4	3	2	3	3	5	3	4	4	5	4	5	3	2
[truncated: 13 more columns]
